# Supplementary material for: Defect of Adaptation to Hypoxia in Patients With COPD Due to Reduction of Histone Deacetylase 7
Source: PubMed Central journal article supplement — Chest. 2011 Dec 15;141(5):1233–42. doi: 10.1378/chest.11-1536 (PMC3342783; doi:10.1378/chest.11-1536), 2011-12-15
Supplement: supp_11-1536_Online_Supplement_11-1536.pdf [file supp_11-1536_Online_Supplement_11-1536.pdf]

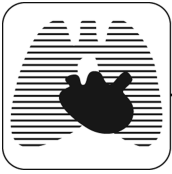

## Defect of Adaptation to Hypoxia in Patients With COPD Due to Reduction of Histone Deacetylase 7

Masako To, MD, PhD; Satoshi Yamamura, PhD; Kenichi Akashi, MD, PhD; Catherine E. Charron, PhD; Kosuke Haruki, MD, PhD, MTropMed; Peter J. Barnes, DM, DSc, FCCP; and Kazuhiro Ito, DVM, PhD

**e-Table 1.** Patient Characteristics (Peripheral lung tissue obtained from a tissue bank)

|                           | Non-smokers | Smokers without COPD | COPD              |
|---------------------------|-------------|----------------------|-------------------|
| N                         | 8           | 7                    | 19                |
| Age (yr)                  | 57±18       | 62±11                | 59±8              |
| Sex (F:M)                 | 4 : 4       | 3 : 4                | 11 : 8            |
| Pack-year                 | 0 ± 0       | 49± 27               | 44 ± 19           |
| FEV <sub>1</sub> (L)      | 3.12 ±0.89  | 3.08 ±1.01           | 1.36 ±0.77***, ++ |
| FEV (%predicted)          | 100 ±15     | 103 ±10              | 46 ±23***, +++    |
| FEV <sub>1</sub> /FVC (%) | 81 ±3       | 76 ±5                | 49 ±12***, +++    |

FEV: forced expiratory volume, FEV<sub>1</sub>: forced expiratory volume in 1 second

\*\*\*: p>0.001 compared to non-smokers, +++: p>0.001 compared to smokers,

++: p>0.01 compared to smokers

*Online supplements are not copyedited prior to posting.*



e-Figure 1.

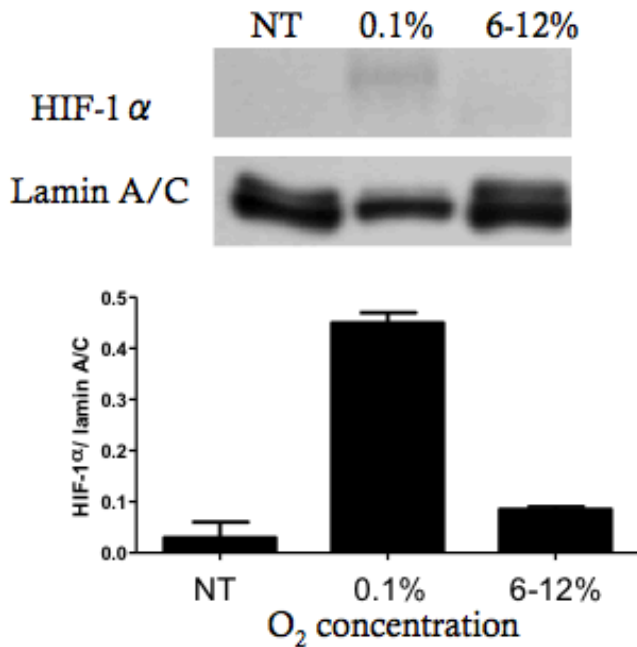

### e-Figure 1. Optimization of hypoxia system

A549 cells were incubated in hypoxic condition (0.1% O<sub>2</sub>, 5% CO<sub>2</sub>, or 6-12% O<sub>2</sub>, 5% CO<sub>2</sub>) for 24 hrs. Nuclear protein was extracted and HIF-1α protein was detected. HIF-1α protein was normalised by lamin A/C.



e-Figure 2.

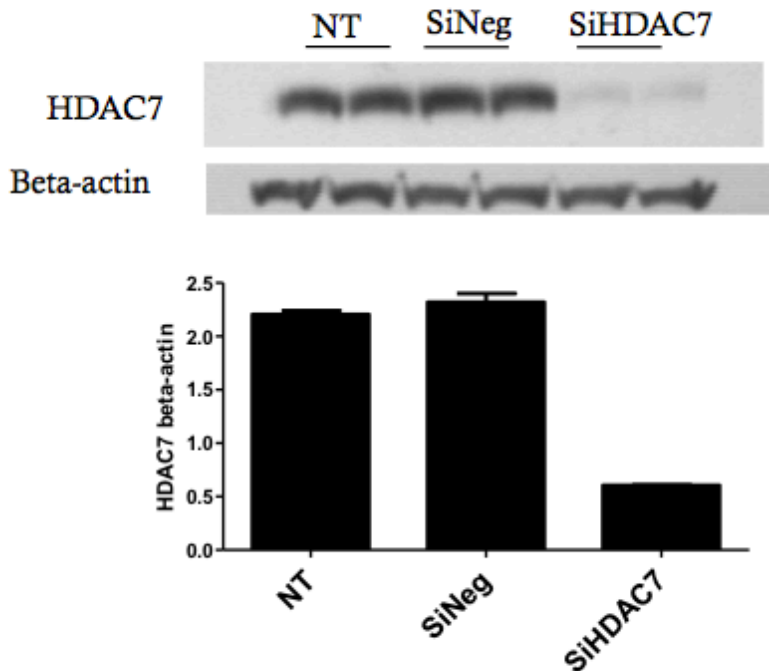

**e-Figure 2. Effect of siRNA transfection (HDAC7) on HDAC7 protein expression**  
Short interference RNA of HDAC7 was transfected to A549, and then cells were incubated 24 hrs, followed by measurement of HDAC7 protein in whole cell extract. HDAC7 protein was normalised by beta-actin.
